# Supplementary material for: Exploring Cinnamoyl-Substituted Mannopyranosides: Synthesis, Evaluation of Antimicrobial Properties, and Molecular Docking Studies Targeting H5N1 Influenza A Virus
Source: MDPI journal article supplement (doi:10.3390/molecules28248001), 2023-12-07
Supplement: s1 [file s1]

## Supplementary Materials

# Exploring Cinnamoyl-Substituted Mannopyranosides: Synthesis, Evaluation of Antimicrobial Properties, and Molecular Docking Studies Targeting H5N1 Influenza A Virus

Sabina Akter <sup>1</sup>, Bader Y. Alhatlani <sup>2,\*</sup>, Emad M. Abdallah <sup>3</sup>, Supriyo Saha <sup>4</sup>, Jannatul Ferdous <sup>1</sup>, Md Emdad Hossain <sup>5</sup>, Ferdausi Ali <sup>6</sup> and Sarkar M. A. Kawsar <sup>1,\*</sup>

- <sup>1</sup> Laboratory of Carbohydrate and Nucleoside Chemistry (LCNC), Department of Chemistry, Faculty of Science, University of Chittagong, Chittagong 4331, Bangladesh; sabinaprimu@gmail.com (S.A.); jannat\_080911@yahoo.com (J.F.)
  - <sup>2</sup> Unit of Scientific Research, Applied College, Qassim University, Buraydah 52571, Saudi Arabia
  - <sup>3</sup> Department of Science Laboratories, College of Science and Arts, Qassim University, ArRass 51921, Saudi Arabia; 140208@qu.edu.sa
  - <sup>4</sup> Uttaranchal Institute of Pharmaceutical Sciences, Uttaranchal University, Dehradun 248007, Uttarakhand, India; supriyo9@gmail.com
  - <sup>5</sup> Wazed Miah Science Research Centre, Jahangirnagar University, Savar, Dhaka 1342, Bangladesh; emdad121542@gmail.com
  - <sup>6</sup> Department of Microbiology, Faculty of Biological Science, University of Chittagong, Chittagong 4331, Bangladesh; seema@cu.ac.bd
- \* Correspondence: balhatlani@qu.edu.sa (B.Y.A.); akawsarabe@yahoo.com (S.M.A.K.)

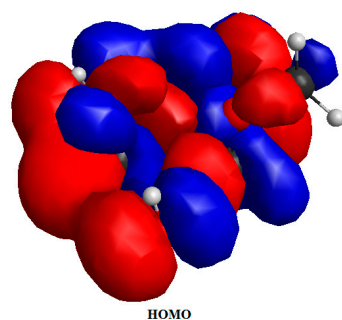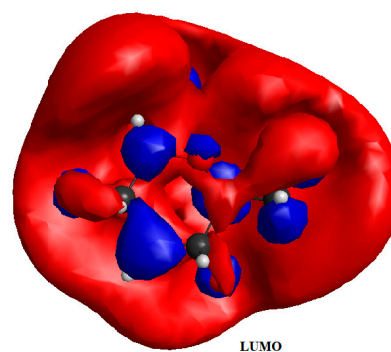

1

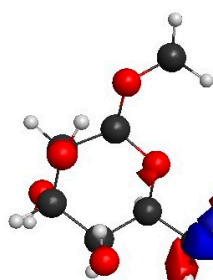

HOMO

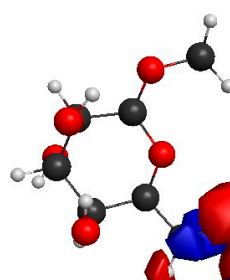

LUMO

2

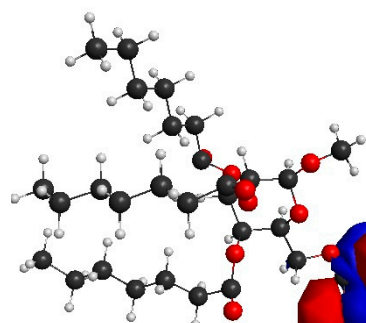

HOMO

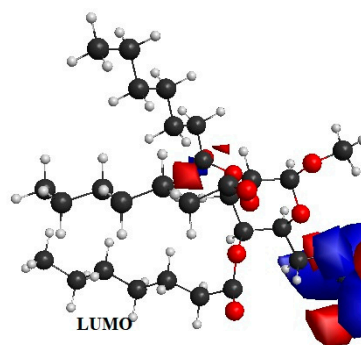

LUMO

3

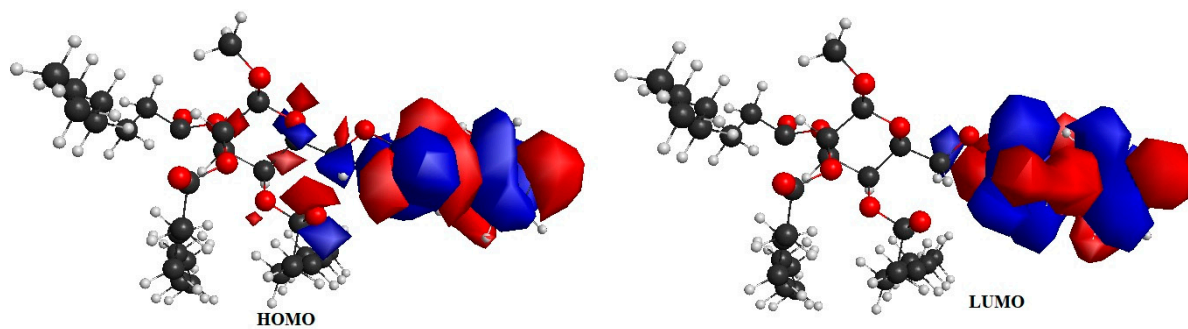

4

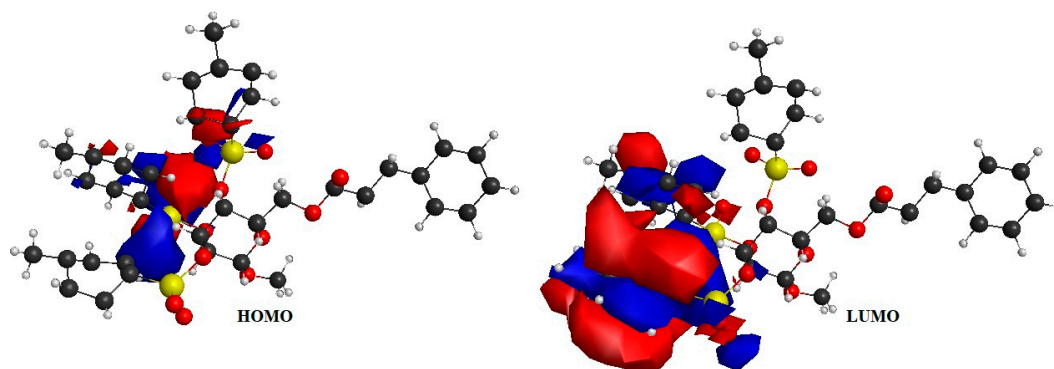

5

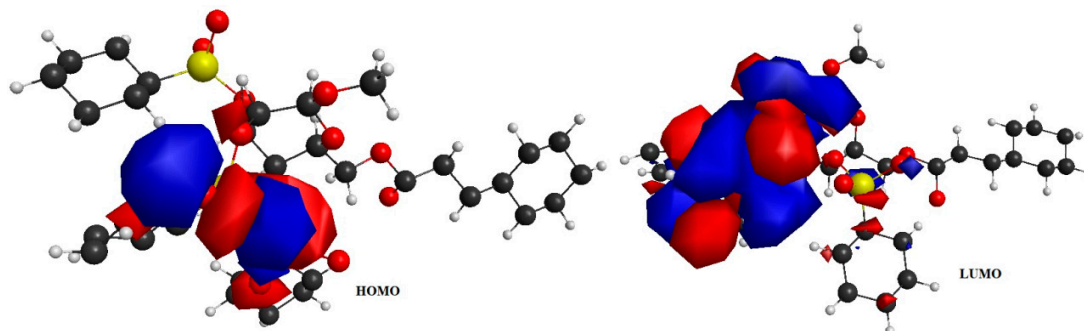

6

Figure S1. FMO analysis data of compounds 1, 2, 3, 4, 5, and 6.

Fixed Range -0.2 to 0.2  
Click again for dynamic scale

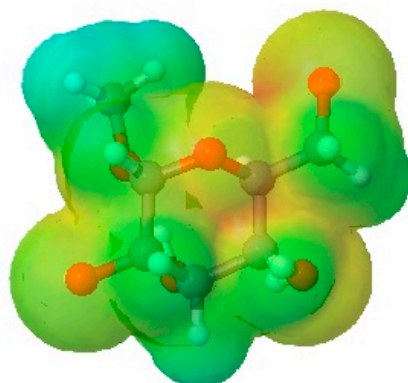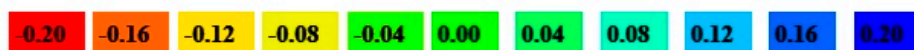

1

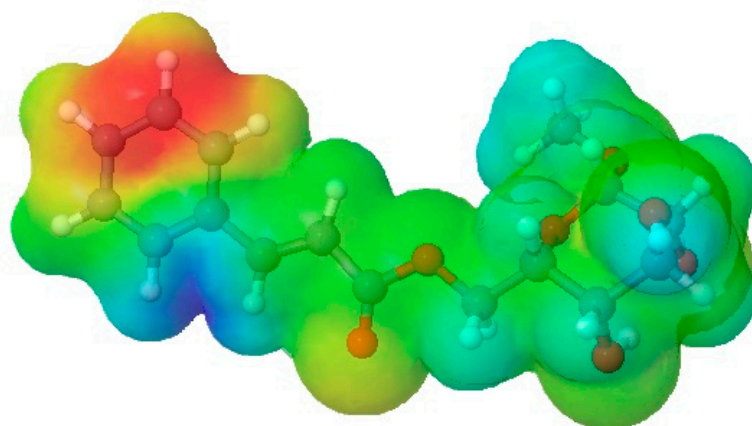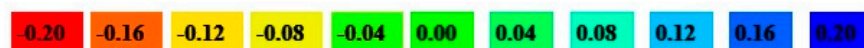

2

**Fixed Range -0.2 to 0.2**  
**Click again for dynamic scale**

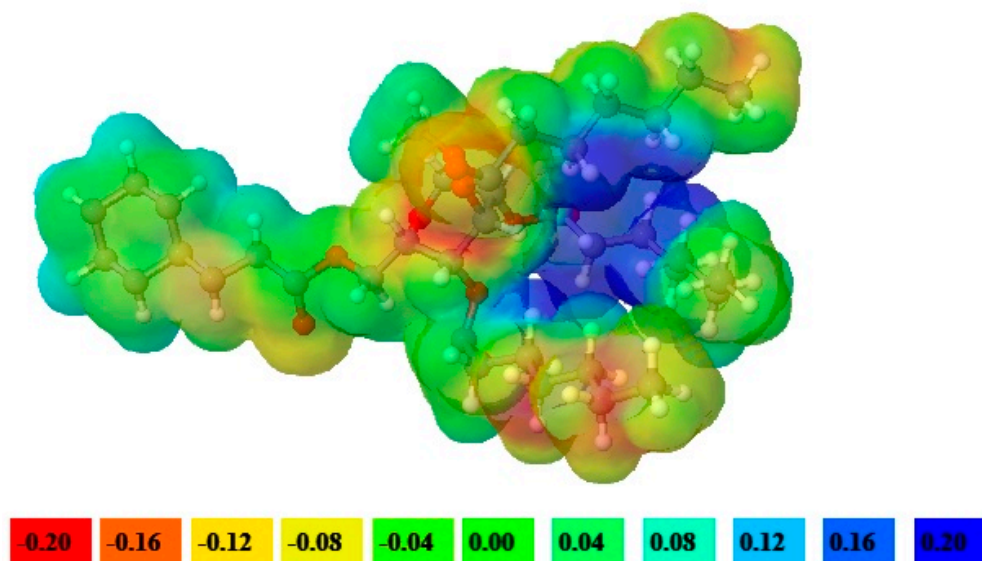

3

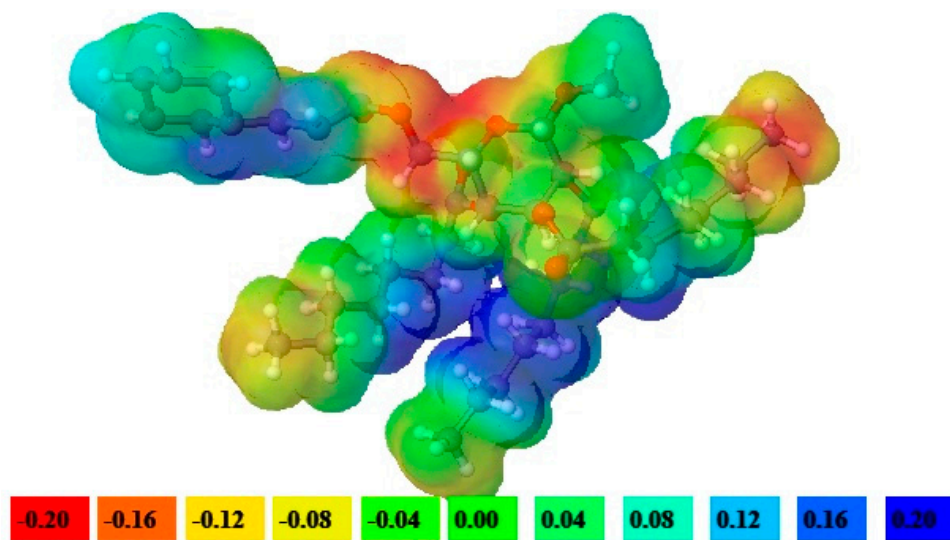

4

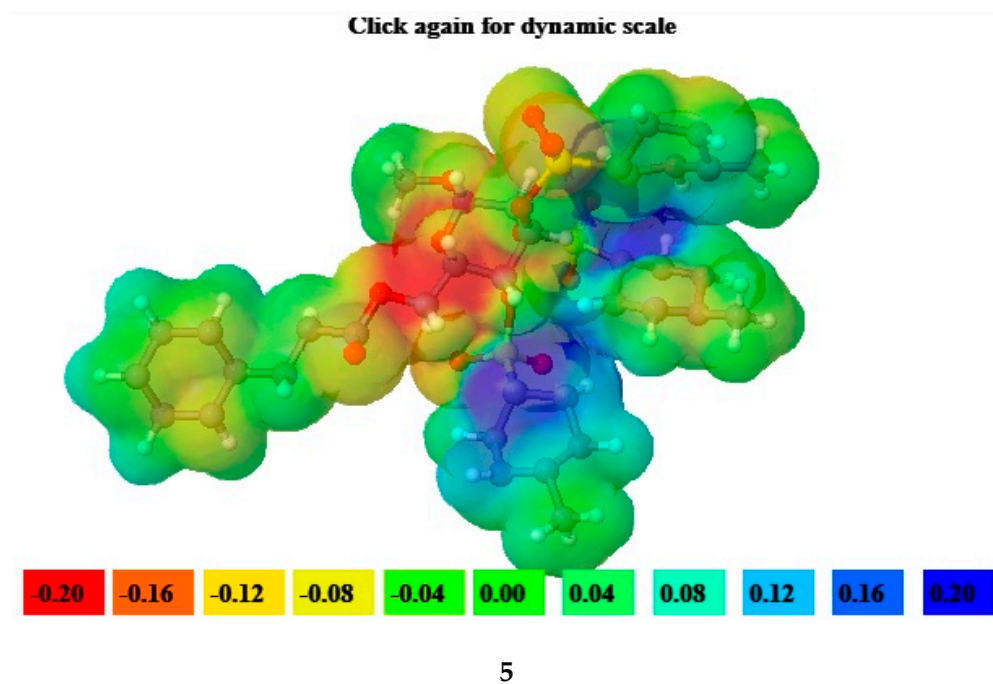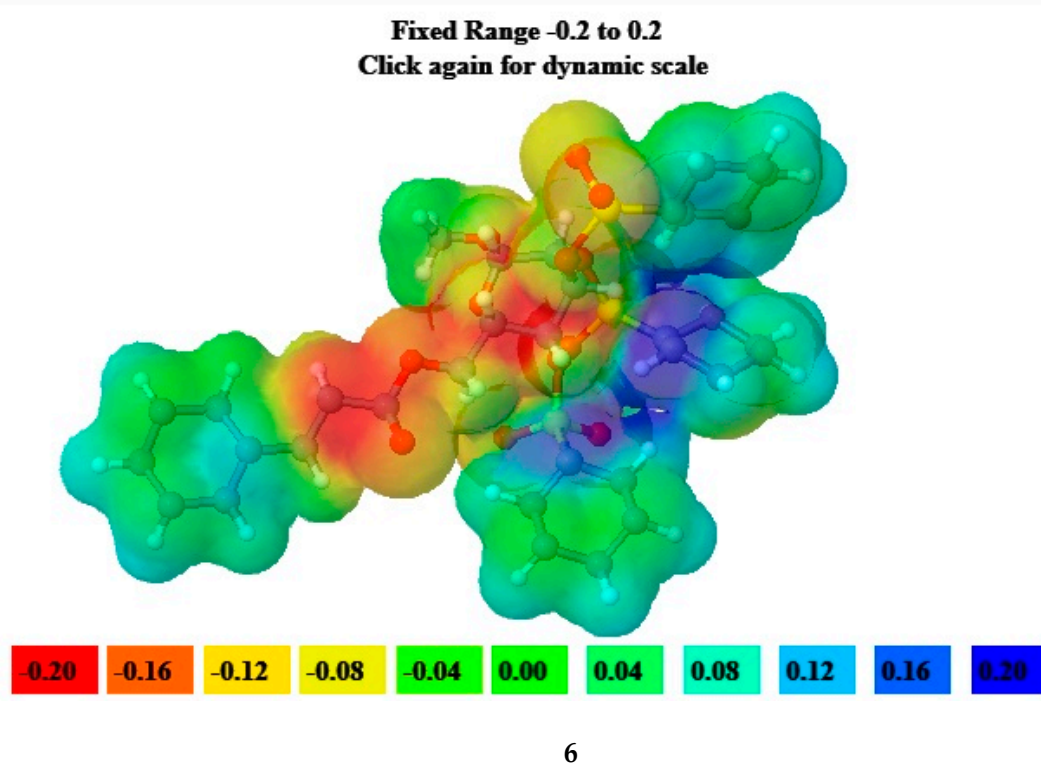

Figure S2. MEP analysis data of compounds 1, 2, 3, 4, 5, and 6.

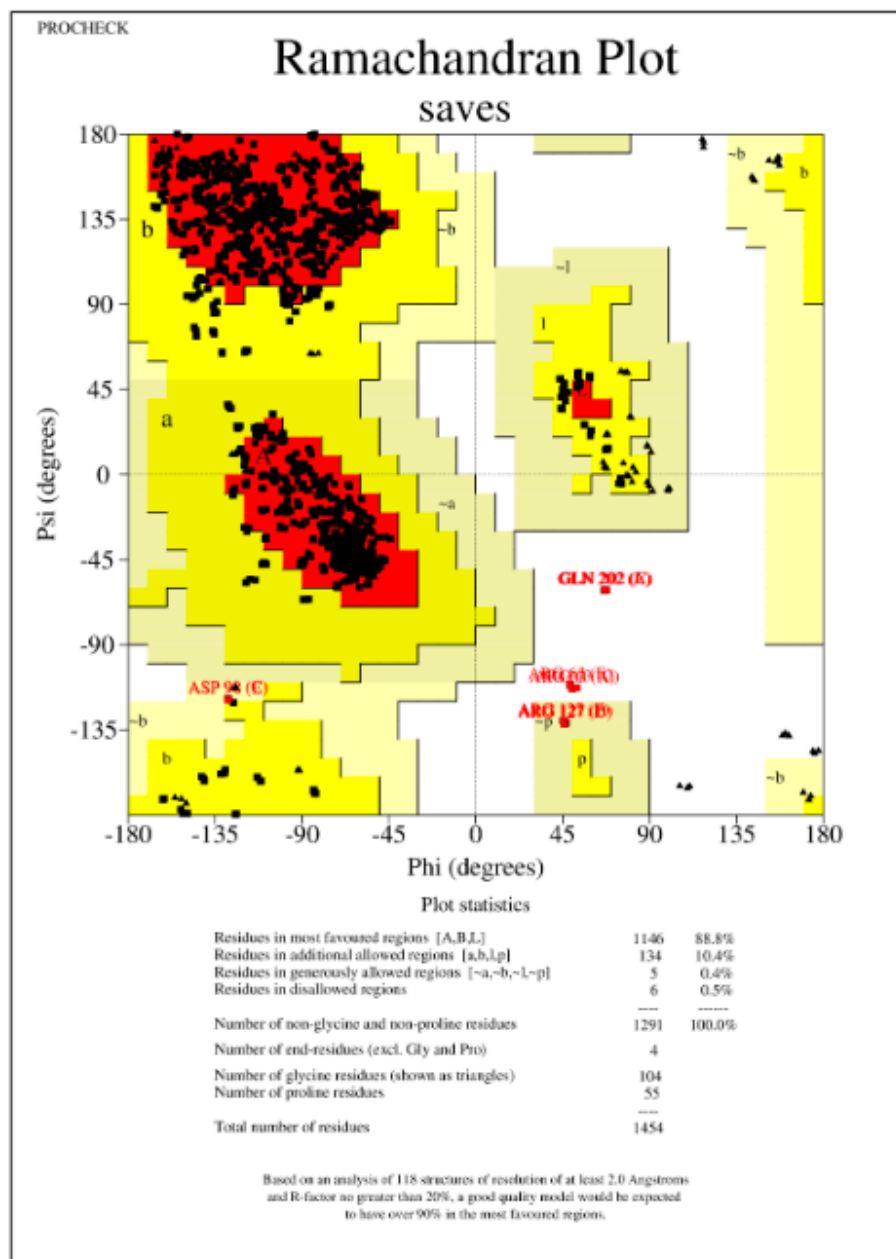

**Figure S3.** Ramachandran plot of 6VMZ.
